# Supplementary material
Source: PubMed Central journal article supplement (PMC5607402)
Supplement: IAI.00069-17_zii999092171s1.pdf [file IAI.00069-17_zii999092171s1.pdf]

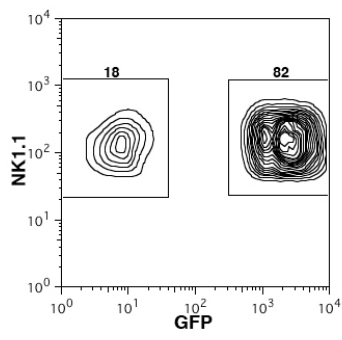

**Fig S1** Percentage of infected NK cells used in the conjugation assay shown in FIG 2.

**Fig S2** Induction of STAT phosphorylation upon *T. gondii* infection of NK cells.

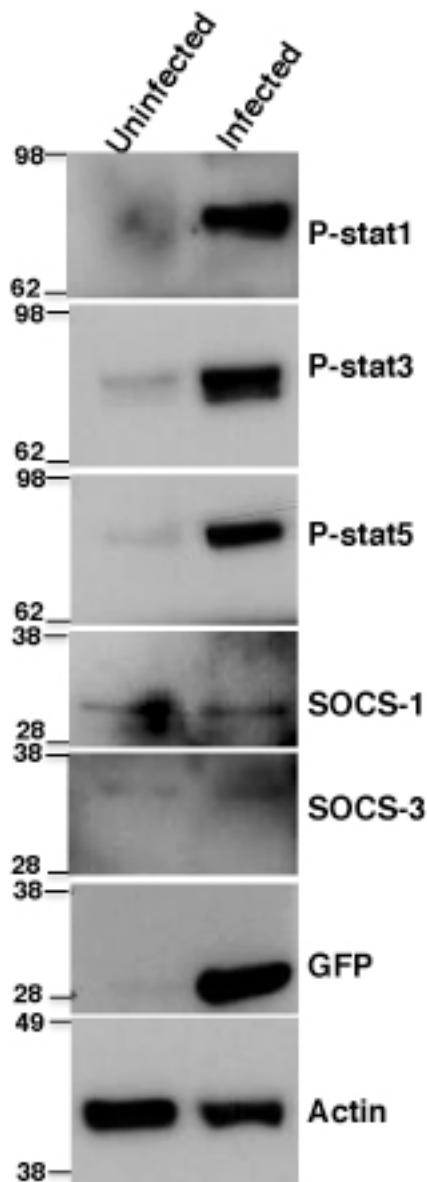

Increased phosphorylation of STATs was observed in NK cells infected with *T. gondii*. However there did not appear to be large differences in the expression of SOCS1 or SOCS3 upon *T. gondii* infection.

NK cells incubated with *Toxoplasma* for 2 hours and then stimulated with IL-12 and IL-18. After one hour, cells were collected and sorted by gating on live GFP<sup>+</sup> or GFP<sup>-</sup> NKp46<sup>+</sup> cells. After collection(1), cells were lysed with Christea Buffer (20 mM HEPES, pH 7.4, 110 mM potassium acetate, 2 mM magnesium chloride, 0.1% (vol/vol) Tween 20, 1% (vol/vol) Triton X-100, 0.5% (wt/vol) sodium deoxycholate, and 500 mM sodium chloride (1) supplemented with complete protease inhibitor (ThermoFisher) and PhosSTOP phosphatase inhibitor cocktails (ThermoFisher) on ice. Then the lysates were mixed with 4×reducing NuPAGE lithium dodecyl sulfate (LDS) sample buffer (Life Technologies), followed by SDS-PAGE and Western blotting analysis for the indicated proteins. Membranes were blocked in

TBST with 5% (w/v) nonfat dry milk. Antibodies were applied as: P-stat1 (Cell Signaling 9171, 1:500), P-stat3, (Cell Signalling 9145, 1:500), P-stat5 (Cell Signaling 4322, 1:500), SOCS-1 (Santa Cruz sc-9021, 1:500), SOCS-3 (Cell signalling 2932, 1:500), actin (Santa Cruz sc-1616, 1.500) GFP (Abcam ab290, 1:3000).

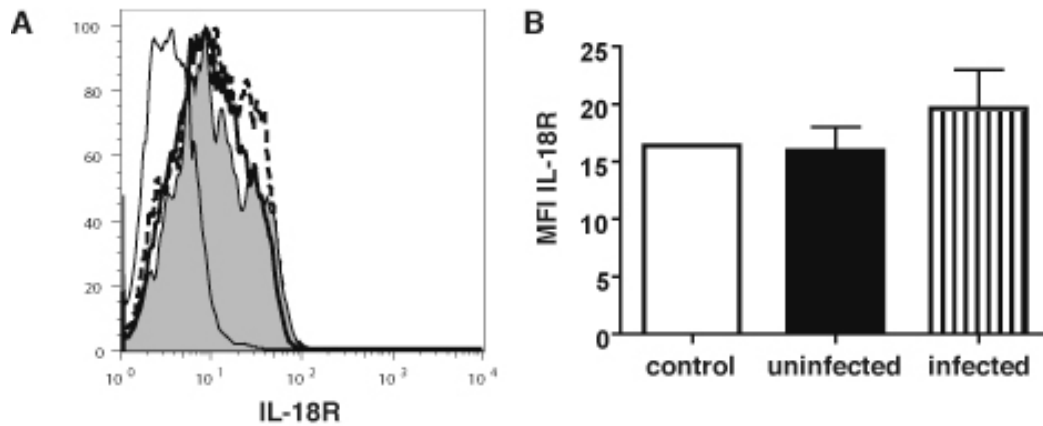

**Fig S3** Expression of IL-18R on NK cells is not affected by *T. gondii* infection. (A) Expression of IL-18R on control NK cells (*dashed line*), bystander NK cells (*solid line*) and infected NK cells (*shaded*). (B) Expression levels from 2 experiments.

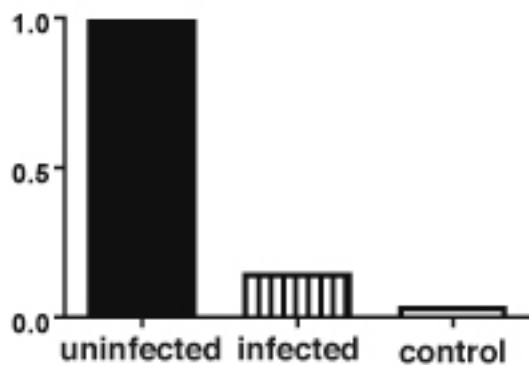

**Fig S4** TNF is inhibited in *T. gondii* infected NK cells.

qPCR of TNF RNA, comparing the relative expression of TNF between uninfected NK cells (*filled columns*) with infected NK cells (*lined columns*) from the same culture stimulated with IL-12 and IL-18, and NK cells that were not stimulated with IL-12 and IL-18 (control). NK cells infected with RH-LDM *T. gondii* were activated with IL-12 and IL-18 as outlined above and then sorted by flow cytometry based on the expression of GFP. RNA was isolated from TRIReagent (Sigma-Aldrich)-treated samples according to the manufacturer's instructions. Total RNA was reverse transcribed (RevertAid First Strand cDNA Synthesis kit, Thermofisher) and levels of TNF were quantified by real-time PCR (SYBR Green Jumpstart Taq Ready Mix, Sigma-Aldrich) using the following sequences: forward GGC TGC CCC GAC TAC GT

reverse GAC TTT CTC CTG GTA TGA GAT AGC AAA. The relative amount of transcripts was calculated with the  $2^{-\Delta\Delta Ct}$  method in relation to HPRT or U6 (for miRNA) and calibrated to uninfected cells. Specificity of obtained products was confirmed with dissociation curves.

Reference

1. **Cristea IM, Carroll JW, Rout MP, Rice CM, Chait BT, MacDonald MR.** 2006. Tracking and elucidating alphavirus-host protein interactions. *J Biol Chem* **281**:30269-30278.
